# Supplementary material
Source: PubMed Central journal article supplement (PMC5250569)
Supplement: NIHMS838830-supplement-1.pdf [file NIHMS838830-supplement-1.pdf]

## Data File S1. Detailed Protocol

### *Lysis*

1. Thaw cell pellet vials on ice.
2. Add 0.5 mL of SDS Lysis Buffer (see recipe) per vial and let set for 5 min. Each vial contains  $10^7$  cells  $\sim$ 0.5 mg of protein.
3. Take 21G syringe and pump up and down slowly 12X, then switch to 25G needle and pump 8X using a new syringe for each sample.
4. Transfer to protein-lo bind 1.5mL Eppendorf tube.

### *Reduction and Alkylation of Cysteines*

1. After lysis, transfer tubes to heated 56 C plate for 25 min or 37C degree for 1hr.
2. Remove from the incubator and cool to room temp.
3. Add 15 $\mu$ L of 0.5M iodoacetamide (see recipe) to a final concentration of 15 mM.
4. Incubate for 30 minutes at room temp in the dark.

### *Protein Assay*

1. Remove 8.33  $\mu$ L per sample and add 16.67  $\mu$ L of water to each well of a microplate.
2. Perform the BCA Assay from Pierce (Rockford, IL) in duplicate according to manufacturer's instructions. Use a reduced and alkylated vial of lysis buffer as the blank for the cellular samples.

### *Chloroform:Methanol Precipitation*

1. Take 150  $\mu$ g of sample and place in a 1.5 mL protein lo-bind Eppendorf tube.
2. Add 465  $\mu$ L of cold Methanol and vortex.
3. Add 310  $\mu$ L of Chloroform and vortex.
4. Add (543  $\mu$ L - sample volume) of water and vortex thoroughly.
5. Place sample in a centrifuge and spin for 10 min at 10k rpm.
6. Remove and discard upper layer.
7. Add 465  $\mu$ L of cold Methanol and vortex.
8. Spin for 5 min at 10k rpm.
9. Remove liquid without disrupting pellet.
10. Repeat steps 8-9 two times, removing the last bit of methanol after the last wash.
11. Redissolve the pellet in 50  $\mu$ L of freshly prepared 8M urea digestion buffer (see recipe).
12. Incubate at 37C degree for 10 min to aid re-solubilizing.

### *Lys-C Digest*

1. Dilute samples 2x by adding 50  $\mu$ L of 20 mM HEPES pH 8.5 and vortex.
2. Add 2  $\mu$ g of Lys-C for a 1:75 enzyme:substrate ratio and mix.
3. Incubate at room temperature overnight for 16 hr.

### *Trypsin Digest*

1. Dilute samples by adding 150  $\mu\text{L}$  of 20 mM HEPES pH 8.5 and vortex.
2. Add 2  $\mu\text{g}$  of Trypsin for a 1:75 enzyme:substrate ratio and mix.
3. Incubate at 37C degree for 6hr.
4. Take 1  $\mu\text{g}$  per sample and desalt to test digestion efficiency (missed cleavages should be <20%).

### *TMT Labeling*

1. Vortex and spin samples at 10k rpm for 5min.
2. Remove 60  $\mu\text{g}$  to new tubes, trying not to disturb the pellet if one is present.
3. Add ACN (acetonitrile) to 10% v/v.
4. Add 7 $\mu\text{L}$  of TMT (Pierce, Rockford, IL). Vortex and incubate 1hr at room temperature.
5. Remove 1  $\mu\text{g}$  per sample, pool all samples in each 10-plex and desalt to test labeling efficiency (should be greater than 99%).
6. Add 1% final v/v of hydroxyl amine and let incubate for 10 min at room temperature to quench.
7. Combine samples and add formic acid to lower pH to <3.
8. Spin 12000 rpm x 10min.
9. Remove supernatant and dilute to lower ACN % to <5% with 1% formic acid (FA) in water.
10. Desalt and evaporate to dryness in a speed vac.
11. Optional - use a bridge sample (combination of all samples) or a known amount of target peptide, as optional additional reference channels for comparison.

### *Injecting samples*

1. Reconstitute dried sample in 3% ACN, 5% FA in HPLC grade water.
2. Add trigger peptide to target sample, and load 5-8  $\mu\text{g}$  of peptide onto the LC column.
3. See methods for instrument settings.

## **Recipes**

### 100 mL of the Lysis Buffer

1. 2g SDS
2. 3mL of 5M NaCl
3. 5mL of 1M Tris pH 8.8
4. \*500 $\mu\text{L}$  1M DTT (1M stock made fresh dissolving 154.25 mg in 1mL H<sub>2</sub>O)
5. 91.7mL H<sub>2</sub>O (HPLC Grade)
6. 100 $\mu\text{L}$  of Sodium Vanadate 200mM
7. 10 tablets of Roche phosstop phosphatase inhibitor
8. 2 tablets of Roche Complete protease inhibitor (EDTA Free)
9. Freeze in 6 50 mL tubes containing 16.5 mL each.

\*Added fresh on the day of use.

3mL of 0.5M Iodoacetamide

1. Dilute 277.44mg iodoacetamide in 3mL HPLC grade water and vortex.

10 mL of Digestion Buffer - made fresh before each use

1. Add 4.8 g Urea to 15 mL falcon tube.
2. Add 1mL of 200 mM HEPES pH = 8.5 (pH adjusted with amine-free acids and bases)
3. Add HPLC grade water up to 10 mL mark on tube and vortex thoroughly.
